# Supplementary material
Source: MDPI journal article supplement (https://www.mdpi.com/2077-0472/11/11/1113)
Supplement: s1 [file s1 › agriculture-1418301-supplementary.pdf]

Supplementary Materials:

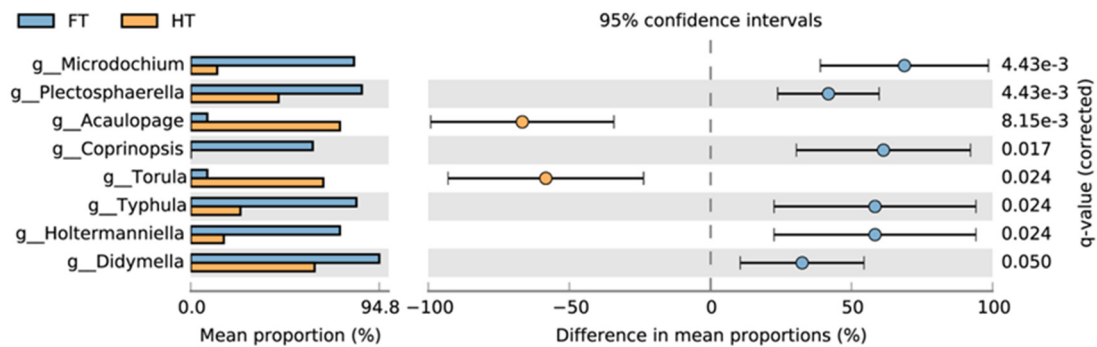

**Figure S1.** Welch' s t-test and Storey' s FDR were used to evaluate biological importance ( $p < 0.05$ ) and differences between FT and RT treatment on genus level.

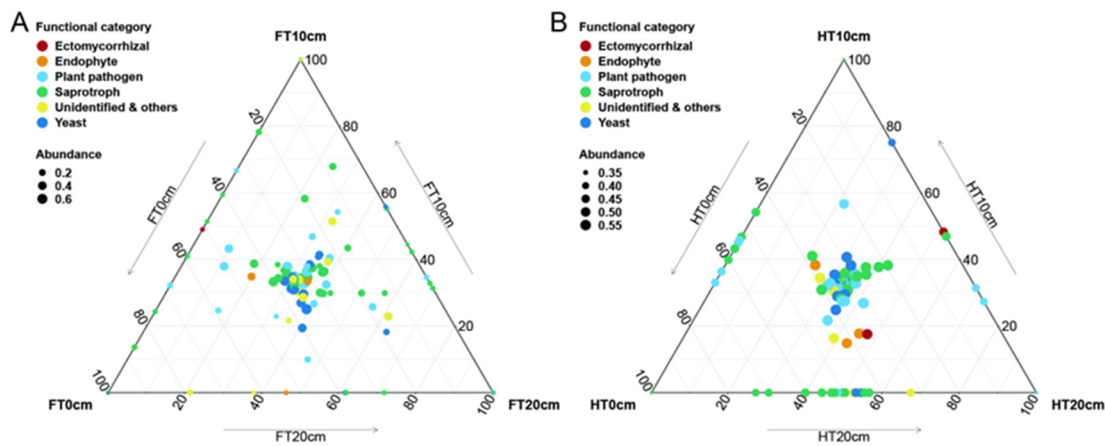

**Figure S2.** Potential function succession of soil fungal communities in (A) freeze-thaw treatment and (B) homoiothermal treatment.

**Table S1.** Network parameters without potential keystone.

| Treatment | Water    | Nodes/Edge | Average | Average Weighted | Modularit |
|-----------|----------|------------|---------|------------------|-----------|
| s         | coverage | s          | Degree  | Degree           | y         |
| FT        | 0cm      | 68/146     | 3.066   | 2.892            | 1.03      |
|           | 10cm     | 62/154     | 3.317   | 2.237            | 1.02      |
|           | 20cm     | 61/132     | 3.054   | 1.514            | 1.131     |
| HT        | 0cm      | 73/165     | 3.623   | 2.529            | 0.987     |
|           | 10cm     | 59/140     | 3.91    | 3.014            | 0.746     |
|           | 20cm     | 67/173     | 4.372   | 3.661            | 0.755     |
